# Supplementary material for: Functional Characterization of Serotonin N-Acetyltransferase in Archaeon Thermoplasma volcanium
Source: MDPI journal article supplement (doi:10.3390/antiox11030596), 2022-03-21
Supplement: s1 [file s1]

Supplemental Table S1. Sequences of primers used in this study

| Gene                                                    | Forward (5'-3')                         | Reverse (5'-3')                         |
|---------------------------------------------------------|-----------------------------------------|-----------------------------------------|
| Sequences of primers used for <i>E. coli</i> expression |                                         |                                         |
| MaGNAT                                                  | AAA AAG CAG GCT CCA TGG TGA CCC TCG GCG | AGA AAG CTG GGT TCA GCA GGT GCG CTC CCC |
| PfGNAT                                                  | AAA AAG CAG GCT CCA TGA TCA TAG AGA AGG | AGA AAG CTG GGT TCA CGA GTT CTT GAA CTT |
| TvGNAT                                                  | AAA AAG CAG GCT CCA TGG CGA TCA ACG CGG | AGA AAG CTG GGT TCA CAC GAT CCG CCA CAT |
| attB                                                    | GGG GAC AAG TTT GTA CAA AAA AGC AGG CT  | GGG GAC CAC TTT GTA CAA GAA AGC TGG GT  |
| Sequences of primers used for transgenic rice plant     |                                         |                                         |
| TvSNAT                                                  | AAA AAG CAG GCT CCA TGG CGA TCA ACG CGG | AGA AAG CTG GGT TCA CAC GAT CCG CCA CAT |
| GIF1                                                    | CCC GCC GGC GAC GAG CAC CAC AT          | CCG CCG GCC TGA ACA CCC TGA AGA         |
| GW2                                                     | CAG CCA CCC AGT ATG GAC TT              | GGT GAA CAA AAA GGC CAA GA              |
| UBQ5                                                    | CCG ACT ACA ACA TCC AGA AGG AG          | AAC AGG AGC CTA CGC CTA AGC             |
| attB                                                    | GGG GAC AAG TTT GTA CAA AAA AGC AGG CT  | GGG GAC CAC TTT GTA CAA GAA AGC TGG GT  |

Supplemental Table S2. Full length nucleotide sequences of three *GNAT* genes of both native and synthetic forms. The nucleotide sequences of synthetic GNAT genes were codon-optimized with reference to the rice SNAT2 codon. Modified nucleotides were shown in bold.

| Gene                                                     | Native nucleotide sequence                                                                                                                                                                                                                                                                                                                                                                                                                                                                                                                                                  | Modified synthetic nucleotide sequence                                                                                                                                                                                                                                                                                                                                                                                                                                                                                                                                                                                                                                                                      |
|----------------------------------------------------------|-----------------------------------------------------------------------------------------------------------------------------------------------------------------------------------------------------------------------------------------------------------------------------------------------------------------------------------------------------------------------------------------------------------------------------------------------------------------------------------------------------------------------------------------------------------------------------|-------------------------------------------------------------------------------------------------------------------------------------------------------------------------------------------------------------------------------------------------------------------------------------------------------------------------------------------------------------------------------------------------------------------------------------------------------------------------------------------------------------------------------------------------------------------------------------------------------------------------------------------------------------------------------------------------------------|
| <i>Ma</i><br><i>GNAT</i>                                 | atggtgaccttggggggcgacatcgatatcttcgcagtcagtgaatgggatgccgaggc<br>gcttcttgcgctctaccgcgcgggggggatggtggaaggaggagtgggacccatccac<br>atcccggctctggtcaggtccaccttctcattcgtggttagccgtgcaccggcagagcggg<br>cggacggctcgggatggggagggcaatatcagacggcgtatcggtatgcgtacattcagg<br>acctcgtcgtcctccccgaattcaggaaccgggggggtcggaaaggcgtccttatgagg<br>cttgttgatatctgcagggccagggggatatcctggatcgcgctcgttgccgagccggga<br>acgtccgacttttaccgggagtcgggggttcgtggtcatggaaggccatattcccatgcgtt<br>accagggagggggagcgcacgtgctga                                                                                  | atggtgaccctcggcggggacatcgacatcttcgcggtg <b>tcgg</b> agtgggac <b>gcgg</b> agggcg<br>ctct <b>ggc</b> gctgtaccgcgcggggcggtggtggaaggaggagtgggaccc <b>gtcc</b> acatc<br>ccggtgctggt <b>gcgctc</b> gacgttctccttcgtggt <b>tcg</b> ggtgcacc <b>gccagtcggg</b> ccgga<br>c <b>cg</b> tgggcatggggcg <b>cgcg</b> gatc <b>tcgg</b> acggcgt <b>gtcc</b> gac <b>gc</b> ctacatccaggacctgg<br>tcgt <b>g</b> ctccc <b>ggag</b> tt <b>ccg</b> caaccggggcg <b>gtgg</b> caaggcgtcctgat <b>gcgg</b> ctcgtgg<br>acatctg <b>tcgcgcgcgc</b> gggatctcgtggatcgcgctcgt <b>ggcgg</b> agccgggcacgtcg<br>acttctacc <b>gcg</b> agtcgggggttcgtcgtgatggagggccacatcc <b>cgatgcg</b> ctaccaggg<br><b>cgggg</b> agcgcacctgctga                   |
| <i>Pf</i><br><i>GNAT</i>                                 | atgataattgaaaagttaatgaaccaatcaagctaaaagatgaccttctaaaattcgtcttt<br>ggagtttatcaaaagcacaaatggagcgtatcccgccctagagtgggcagagaaaaagcc<br>cgaaccaacgattttgagggccttaagaaaaatctatgagccatttttagagttaggctcac<br>aaaagaatttgatgaactctacgttgctaaggacaataacaatattattggaacagtagcatt<br>ggtatacaacctaaaaggaaaggaagtttggtgggtgccagaagaacttagggagaaaa<br>atatcggactaatcgaattctttatggtggatgaaaagtacagaggaagagaatcggga<br>gcaaactcttacctttgcaatcaagagattaaaggaattaggaaggaatatatactg<br>acttttccccacttacccgcataccaatattatctaaagaaggggttcagaaggtcatgga<br>ctcaaaagagttcgtgattctaaaattcaagaattcatga | atgatcatagagaaggtgaacgagccgatcaagctcaaggacgacctctgaagttcgtgtt<br><b>cg</b> cggtgtaccag <b>tcg</b> accaac <b>ggcgc</b> gtacc <b>ggcgc</b> gtgagtgggcggagaagaag<br>cccagccgaacgacttcgagggcttcaagaagatctacgagccgttctggagt <b>tcgc</b> ct<br><b>g</b> accaaggag <b>tcg</b> acgagctctacgtggcgaaggacaacaatatcatcggcac <b>gg</b> t<br><b>ggcgc</b> tcgtctacaacctgaagggaaggaggtgtggtgggtgcccgaggagct <b>ccgc</b><br>agaagaacatcgggctcatagagttctcatggtggacgagaagtac <b>gcggg</b> aag <b>cg</b> gat<br><b>tgctcga</b> agctctgacgttcgcgatcaagag <b>gct</b> caaggagctgggcaaggagatctac<br>atcgtcaccttcccgcacctccccgcgtaccagtactacctcaagaagggttcagaaagt<br><b>gat</b> ggactacaagagttcgtgactc <b>tg</b> aagttcaagaactcgtga |
| <i>Tv</i><br><i>Ard1</i><br>( <i>Tv</i><br><i>SNAT</i> ) | atggctattaatgctgttgccggaactatcagagagtctcaccgaaagatatcgagagtgt<br>ttataggatagcacagacttccttaactgagtattatcgcgaagccctgatacttgatctcca<br>cagagaatggccggaatcatttatggtttacactgtagctggttctgtgtcggttttatagta<br>ggatcgaagtattcagggacgggagccaggatattactcttcgcagtcgatgagaggttc<br>aggagaatgggtgtaggcagcgattgatggatgattccttagcctgtgcagagagca<br>gaacatgctcagcgtaaggctggaagtcaggacagacaatgacgaagctataagattct<br>acaaaaaatatggattcgtcattactgctatgctacaaactattatagcgattcatccaatg<br>cgtatacaaatgtggcgatatagtttaa                                                                           | atggcgatcaacgcggtggcgggcaccatccgcgagttctc <b>gccc</b> aaggacatcgag <b>tcg</b><br><b>gtg</b> taccgcategcgcagacctc <b>gctg</b> accgagtactacaccagggcgtgactctcgacc<br>tcacccgcgagtgggccgagtccttcattggtgtacaccgtggccggtcgggtggtcggttc<br>atcgtggggtcgaagtactcgcgcacggaggcgaggatcctgctcttcgcggtcgacgag<br><b>cggttcgggc</b> catggggcgtggg <b>tcggc</b> gtgatggac <b>gcgttc</b> ctg <b>tc</b> ctgtg <b>tcggg</b><br>agcagaacatgctc <b>cggtgcgc</b> ctggaggtgcgcaccgacaacgacgaggcgatccgt<br>tctacaagaagtacggcttcgtgatc <b>ggcg</b> gatgctg <b>ccg</b> aactactact <b>cg</b> gactcctc <b>g</b><br>aacgcgtacacgatgtggcggatcgtgta                                                                                       |
